# Supplementary material
Source: Springer Nature journal article supplement (https://www.springermedizin.de/resource/supplementary/12974_2005_50_MOESM1_ESM.pdf/9600664)

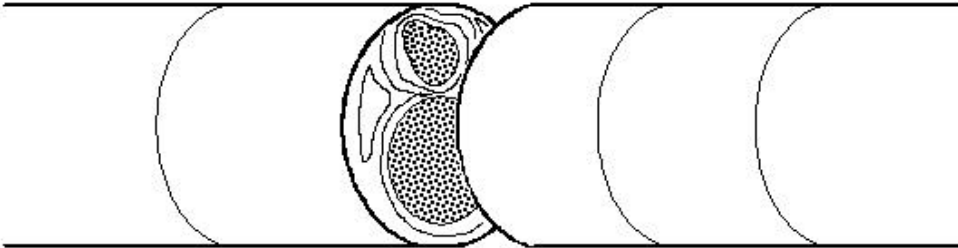

Proximal 2 (P2)

Proximal 1 (P1)

Distal 1 (D1)

Distal 2 (D2)

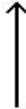

TRANSECTION

Supplement: MOESM1 [file 9600664]
